# Supplementary material for: Activation of peroxymonosulfate by distillers' grains biochar for the degradation of ciprofloxacin: critical roles of singlet oxygen and electron transfer
Source: Royal Society of Chemistry journal article supplement (doi:10.1039/d6ra02077a), 2026-04-22
Supplement: d6ra02077a1.pdf [file d6ra02077a1.pdf]

## Supplementary Information

### Activation of peroxymonosulfate by distillers' grains biochar for the degradation of ciprofloxacin: Critical roles of singlet oxygen and electron transfer

Hangdao Qin <sup>a,\*</sup>, Pei Liu <sup>a</sup>, Junnan Hao <sup>a</sup>, Lei Xiao <sup>a</sup>, Yong Wang <sup>a</sup>, Jiming Huang <sup>a</sup>,  
Jun Chang <sup>a</sup>, Yuru Shen <sup>a</sup>, Bo Xing <sup>b</sup>, Guo Yang <sup>b</sup>

<sup>a</sup> School of Material and Chemical Engineering, Tongren University, Tongren 554300, China

<sup>b</sup> College of Chemical Engineering, Sichuan University of Science and Engineering, Zigong  
643000, China

\* Corresponding author: Hangdao Qin

E-mail address: qinhangdao@126.com

**Text S1:** SEM images were obtained by a scanning electron microscope (FE-SEM, ZEISS Sigma 300, Germany) armed with an EDS system. The crystallographic structure of the catalysts was characterized by X-ray diffraction (XRD) in the  $2\theta$  range of  $10^\circ$ - $80^\circ$  on a Rigaku Ultima IV diffractometer. The functional groups are presented on the surface of biochar were determined by FT-IR analysis (IRAffinity-1S, Shimadzu Corporation, Japan). Raman spectrum analysis was conducted to evaluate the degree of carbonization of biochar by using a Super LABRAM Raman spectrometer (Dilor, France). The specific surface area, pore volume and average pore width of the catalysts were analyzed by  $N_2$  adsorption-desorption automatic specific surface area analyzer (ASAP 2460, Micromeritics, USA). Analysis of surface chemical information for the catalysts was performed by X-ray photoelectron spectrometry (XPS, Thermo Scientific ESCALAB 250Xi, USA). The formation of the radicals in the reaction was determined by electron paramagnetic resonance spectroscopy (EPR, Bruker EMXPlus, Germany) using 5,5-dimethyl-1-pyrroline N-oxide (DMPO) and 2,2,6,6-tetramethyl-4-piperidone (TEMP) as the trapping reagents.

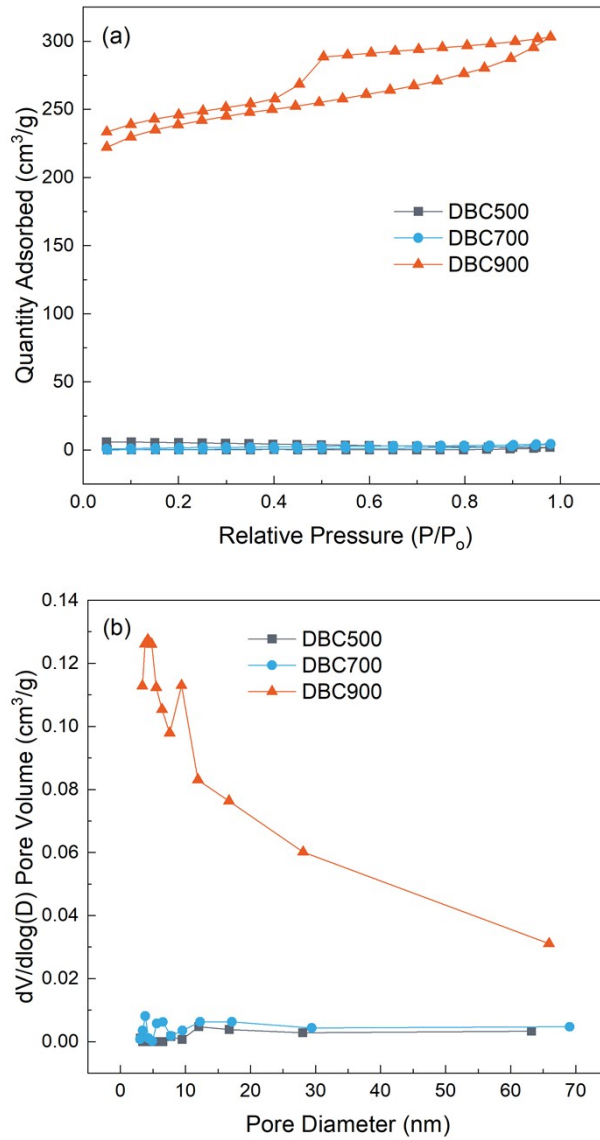

**Fig. S1.** The  $N_2$  adsorption-desorption isotherms (a) and the corresponding pore size distributions (b) of DBC500, DBC700 and DBC900.

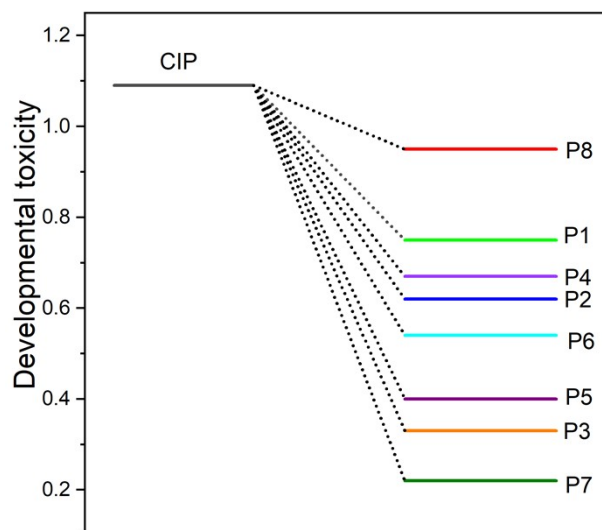

**Fig. S2.** The developmental toxicity of CIP and its intermediates.

**Table S1** The parameters of different water bodies

| Samples         | pH   | TOC (mg/L) | Cl <sup>-</sup> (mg/L) |
|-----------------|------|------------|------------------------|
| Ultrapure water | 7.02 | 0.043      | -                      |
| Tap water       | 7.16 | 0.854      | 0.076                  |
| River water     | 6.82 | 1.453      | 0.062                  |

**Table S2** Structures, retention times and molecular weight/charge (m/z) of the  
5/6

intermediates identified by LC-MS.

| NO. | Proposed intermediates                                                              | Retention time (min) | m/z |
|-----|-------------------------------------------------------------------------------------|----------------------|-----|
| P1  | 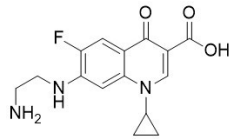   | 9.33                 | 306 |
| P2  |    | 13.12                | 330 |
| P3  |    | 8.43                 | 304 |
| P4  |   | 6.32                 | 288 |
| P5  |  | 12.32                | 245 |
| P6  |  | 11.57                | 218 |
| P7  |  | 16.34                | 178 |
| P8  |  | 17.88                | 146 |
